# Supplementary material for: Rational Design of Ag/ZnO Hybrid Nanoparticles on Sericin/Agarose Composite Film for Enhanced Antimicrobial Applications
Source: PubMed Central journal article supplement (PMC7794692; doi:10.3390/ijms22010105), 2020-12-24
Supplement: ijms-22-00105-s001.pdf [file ijms-22-00105-s001.pdf]

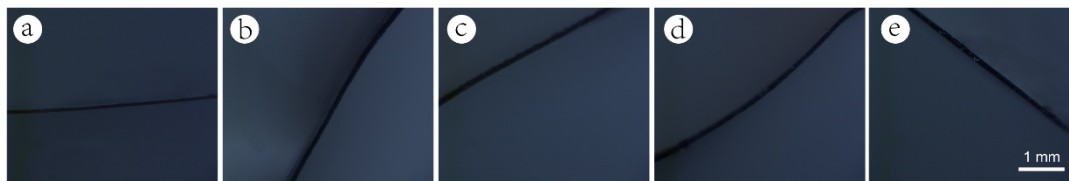

Figure S1. Microscopic pictures of cross-sections of M (a), MP (b), MPZ (c), MPA (d), MPAZ (e) composite films.

Table 1. Thickness of different films.

| Film                           | M                | MP               | MPZ              | MPA              | MPAZ             |
|--------------------------------|------------------|------------------|------------------|------------------|------------------|
| Thickness<br>( $\mu\text{m}$ ) | $28.82 \pm 0.18$ | $36.50 \pm 0.75$ | $47.97 \pm 5.05$ | $50.23 \pm 2.20$ | $58.47 \pm 2.20$ |
